# Supplementary material
Source: PubMed Central journal article supplement (PMC6888660)
Supplement: rccm.201902-0360OC_ley_data_supplement.pdf [file rccm.201902-0360OC_ley_data_supplement.pdf]

**Rare protein-altering telomere-related gene variants in patients with chronic hypersensitivity pneumonitis**

Brett Ley, MD; Dara G. Torgerson, PhD, Justin M. Oldham, MD; Ayodeji Adegunsoye, MD;  
Shuo Liu, MD; Jie Li, PhD; Brett M. Elicker, MD; Travis S. Henry, MD; Jeffrey A. Golden, MD;  
Kirk D. Jones, MD; Amy Dressen, MS; Brian L. Yaspan, PhD; Joseph R. Arron, PhD;  
Imre Noth, MD; Thomas J. Hoffmann, PhD; and Paul J. Wolters, MD

ONLINE DATA SUPPLEMENT

# ONLINE DATA SUPPLEMENT

## SUPPLEMENTAL METHODS

### Clinical Data Collection:

Clinical data collection included demographics, pulmonary function tests, and radiologic, and histopathologic studies. Race and ethnicity were self-reported on enrollment questionnaires. Family history of interstitial lung disease was self-reported on enrollment questionnaires and verified by review of ILD clinical notes. The date of death was recorded clinically and confirmed using the United States Social Security Death Index. Lung transplants and date of lung transplants were recorded clinically. HRCTs were scored by expert chest radiologists (B.M.E. or T.S.H.) using a structured data collection form that included assessment of 2011 ATS/ERS/JRS/ALAT criteria for UIP patterns, semi-quantitative extent of fibrosis, and individual morphologic features (Figure E1). Surgical lung biopsies were scored prospectively in the UCSF cases only, at the time of multidisciplinary team discussion, by an expert lung pathologist (K.J.D.) using a structured pathology data collection form (Figure E2).

### DNA Sequencing:

Sequencing was performed on DNA isolated from peripheral blood in both cohorts. Whole genome sequencing data was generated in the discovery cohort to a read depth of 30X using the Illumina HiSeq X Ten sequencer (Human Longevity Inc, San Diego, CA, USA) and KAPA Hyper Library Kit (Roche Sequencing, Pleasanton, CA, USA). Whole exome sequencing data was generated in the replication cohort to a read depth of 50X using the Illumina Novaseq 6000 S4 Flowcell sequencer (Novogene, Sacramento, CA, USA) and the SureSelect Human All Exome V6 capture kit (Agilent, Santa Clara, CA, USA).

### Variant discovery

*Discovery cohort:* Detailed variant discovery methods for this cohort are as described in [E1].

*Replication cohort:* Raw Illumina paired-end 150bp reads were first subjected to quality control. Adapters were removed from the sequencing reads using scythe (<https://github.com/vsbuffalo/scythe>, version 0.994 beta). Base quality was controlled using a window-based method, sickle (<https://github.com/najoshi/sickle>, version 1.33), with the cutoff set at 30. Reads that are less than 30bp in length were discarded. Next, reads that have passed the quality control were mapped to GRCh38 reference genome using BWA-MEM[E2] with parameter -M for downstream analysis compatibility. PCR duplicates were removed using Picard-tools (<http://broadinstitute.github.io/picard/>, version 2.18.4). Variants were identified using HaplotypeCaller function in GATK[E3] (version 4.0.5.2), followed by variant recalibration using the recommendations from GATK developers.

Variants were annotated for genomic effect using snpEff (v4.3q) and identifiers using dbSNP build 150 (release July 10, 2017).

Samples in both cohorts were excluded for call rates less than 90% (no samples were excluded), identity by descent analysis (patient relatedness),  $\pi$  0.125 or greater (i.e. third-degree relatives), or sex mismatch. Variant sites were excluded for call rates less than 95%.

### Principle Component Analysis

Principal component analysis (PCA) was performed in Plink version 1.9 (see Figures E3-E6). A European subgroup was selected using the first two principal components corresponding to the cluster of self-reported non-Hispanic white patients (discovery cohort: PC1 range -0.05 to -0.022, PC2 range -0.025 to 0.025; replication cohort: PC1 and range 0.0-0.05). PCA was then repeated in this subgroup and outliers greater than 3 standard deviations of the mean of PC1 or in the restricted PCA were further excluded.

### Case-Control Analysis

*Discovery Cohort:* Discovery cohort cases were age- and sex-matched to age-related macular degeneration (AMD) and asthma samples that were sequenced on the same platform during the same calendar years as described in reference [E1]. Cases and controls of European ancestry (EUR admixture  $\geq 0.8$ ) were included in the analysis:

| Variable | CHP cases | Controls |
|----------|-----------|----------|
| N        | 117       | 351      |

|                         |             |             |
|-------------------------|-------------|-------------|
| Age in years, mean (sd) | 63.5 (11.2) | 63.6 (10.8) |
| Female, N (%)           | 68 (58.1)   | 180 (51.3)  |
| N AMD                   | NA          | 124         |
| N Asthma                | NA          | 227         |

The frequency of qualifying variants in cases and controls (per individual) were compared using the odds ratio and Fischer's exact p-values.

*Replication Cohort:* Qualifying variants were identified in the entire Exome Aggregation Consortium (v0.3.1) (ExAC) dataset (n=60,706) and the ExAC non-Finnish European (NFE) sub-population (n=33,370) using the same criteria as CHP cases. The frequency of qualifying variants in cases and controls (per individual) were compared using the odds ratio and Fischer's exact p-values. This was done for all CHP cases compared to the entire ExAC cohort and again restricted to the CHP cases of non-Hispanic white race/ethnicity compared to the ExAC NFE sub-population.

## References

- [E1] Dressen A, Abbas AR, Cabanski C, et al. Analysis of protein-altering variants in telomerase genes and their association with MUC5B common variant status in patients with idiopathic pulmonary fibrosis: a candidate gene sequencing study. *The Lancet Respiratory medicine* (2018).
- [E2] L. H., Aligning sequence reads, clone sequences and assembly contigs with BWA-MEM, arXiv:1303.3997 (2013).
- [E3] R. Poplin, V. Ruano-Rubio, M.A. DePristo, T.J. Fennell, M.O. Carneiro, G.A. Van der Auwera, D.E. Kling, L.D. Gauthier, A. Levy-Moonshine, D. Roazen, K. Shakir, J. Thibault, S. Chandran, C. Whelan, M. Lek, S. Gabriel, M.J. Daly, B. Neale, D.G. MacArthur, E. Banks, Scaling accurate genetic variant discovery to tens of thousands of samples, *bioRxiv* (2018).

# SUPPLEMENTAL TABLES AND FIGURES

Figure E1. Computed tomography of the chest data collection form

| Radiology Scoring and HRCT Classification Form                                                                                                                                                                                                                                                                                                                                                                                                                                                                                                                                                                                                                                                                                                                                                                                                                                                                                                                                                                                                                                                                                                                                                                                                                                                                                                                                                                                                                                                                                                                                                                                                                                                                                                                                                                                              |     | Biopsy Date                                  |             | Review Date |  | Reviewer |  |
|---------------------------------------------------------------------------------------------------------------------------------------------------------------------------------------------------------------------------------------------------------------------------------------------------------------------------------------------------------------------------------------------------------------------------------------------------------------------------------------------------------------------------------------------------------------------------------------------------------------------------------------------------------------------------------------------------------------------------------------------------------------------------------------------------------------------------------------------------------------------------------------------------------------------------------------------------------------------------------------------------------------------------------------------------------------------------------------------------------------------------------------------------------------------------------------------------------------------------------------------------------------------------------------------------------------------------------------------------------------------------------------------------------------------------------------------------------------------------------------------------------------------------------------------------------------------------------------------------------------------------------------------------------------------------------------------------------------------------------------------------------------------------------------------------------------------------------------------|-----|----------------------------------------------|-------------|-------------|--|----------|--|
| Name                                                                                                                                                                                                                                                                                                                                                                                                                                                                                                                                                                                                                                                                                                                                                                                                                                                                                                                                                                                                                                                                                                                                                                                                                                                                                                                                                                                                                                                                                                                                                                                                                                                                                                                                                                                                                                        | MRN | ILD #                                        | Clinic Date |             |  |          |  |
| <b>1. CT scan attributes</b>                                                                                                                                                                                                                                                                                                                                                                                                                                                                                                                                                                                                                                                                                                                                                                                                                                                                                                                                                                                                                                                                                                                                                                                                                                                                                                                                                                                                                                                                                                                                                                                                                                                                                                                                                                                                                |     |                                              |             |             |  |          |  |
| Date                                                                                                                                                                                                                                                                                                                                                                                                                                                                                                                                                                                                                                                                                                                                                                                                                                                                                                                                                                                                                                                                                                                                                                                                                                                                                                                                                                                                                                                                                                                                                                                                                                                                                                                                                                                                                                        |     | No CT Available <input type="checkbox"/> Yes |             |             |  |          |  |
| Min Section Thickness                                                                                                                                                                                                                                                                                                                                                                                                                                                                                                                                                                                                                                                                                                                                                                                                                                                                                                                                                                                                                                                                                                                                                                                                                                                                                                                                                                                                                                                                                                                                                                                                                                                                                                                                                                                                                       |     |                                              |             |             |  |          |  |
| Skipped or full chest <input type="checkbox"/> Skipped <input type="checkbox"/> Full chest                                                                                                                                                                                                                                                                                                                                                                                                                                                                                                                                                                                                                                                                                                                                                                                                                                                                                                                                                                                                                                                                                                                                                                                                                                                                                                                                                                                                                                                                                                                                                                                                                                                                                                                                                  |     |                                              |             |             |  |          |  |
| Supine images <input type="checkbox"/> No <input type="checkbox"/> Yes                                                                                                                                                                                                                                                                                                                                                                                                                                                                                                                                                                                                                                                                                                                                                                                                                                                                                                                                                                                                                                                                                                                                                                                                                                                                                                                                                                                                                                                                                                                                                                                                                                                                                                                                                                      |     |                                              |             |             |  |          |  |
| Prone images <input type="checkbox"/> No <input type="checkbox"/> Yes                                                                                                                                                                                                                                                                                                                                                                                                                                                                                                                                                                                                                                                                                                                                                                                                                                                                                                                                                                                                                                                                                                                                                                                                                                                                                                                                                                                                                                                                                                                                                                                                                                                                                                                                                                       |     |                                              |             |             |  |          |  |
| Expiratory Images <input type="checkbox"/> No <input type="checkbox"/> Yes                                                                                                                                                                                                                                                                                                                                                                                                                                                                                                                                                                                                                                                                                                                                                                                                                                                                                                                                                                                                                                                                                                                                                                                                                                                                                                                                                                                                                                                                                                                                                                                                                                                                                                                                                                  |     |                                              |             |             |  |          |  |
| Edge Enhanced <input type="checkbox"/> No <input type="checkbox"/> Yes                                                                                                                                                                                                                                                                                                                                                                                                                                                                                                                                                                                                                                                                                                                                                                                                                                                                                                                                                                                                                                                                                                                                                                                                                                                                                                                                                                                                                                                                                                                                                                                                                                                                                                                                                                      |     |                                              |             |             |  |          |  |
| Scanned-in films <input type="checkbox"/> No <input type="checkbox"/> Yes                                                                                                                                                                                                                                                                                                                                                                                                                                                                                                                                                                                                                                                                                                                                                                                                                                                                                                                                                                                                                                                                                                                                                                                                                                                                                                                                                                                                                                                                                                                                                                                                                                                                                                                                                                   |     |                                              |             |             |  |          |  |
| <b>2. Fibrosis</b> <input checked="" type="checkbox"/> No <input type="checkbox"/> Yes                                                                                                                                                                                                                                                                                                                                                                                                                                                                                                                                                                                                                                                                                                                                                                                                                                                                                                                                                                                                                                                                                                                                                                                                                                                                                                                                                                                                                                                                                                                                                                                                                                                                                                                                                      |     |                                              |             |             |  |          |  |
| Irregular reticulation <input type="checkbox"/> None <input type="checkbox"/> Mild <input type="checkbox"/> Moderate <input type="checkbox"/> Severe                                                                                                                                                                                                                                                                                                                                                                                                                                                                                                                                                                                                                                                                                                                                                                                                                                                                                                                                                                                                                                                                                                                                                                                                                                                                                                                                                                                                                                                                                                                                                                                                                                                                                        |     |                                              |             |             |  |          |  |
| Traction bronchiectasis <input type="checkbox"/> None <input type="checkbox"/> Mild <input type="checkbox"/> Moderate <input type="checkbox"/> Severe                                                                                                                                                                                                                                                                                                                                                                                                                                                                                                                                                                                                                                                                                                                                                                                                                                                                                                                                                                                                                                                                                                                                                                                                                                                                                                                                                                                                                                                                                                                                                                                                                                                                                       |     |                                              |             |             |  |          |  |
| Honeycombing <input type="checkbox"/> None <input type="checkbox"/> Mild <input type="checkbox"/> Moderate <input type="checkbox"/> Severe                                                                                                                                                                                                                                                                                                                                                                                                                                                                                                                                                                                                                                                                                                                                                                                                                                                                                                                                                                                                                                                                                                                                                                                                                                                                                                                                                                                                                                                                                                                                                                                                                                                                                                  |     |                                              |             |             |  |          |  |
| Craniocaudal distribution <input type="checkbox"/> Lower <input type="checkbox"/> Middle <input type="checkbox"/> Upper <input type="checkbox"/> Diffuse                                                                                                                                                                                                                                                                                                                                                                                                                                                                                                                                                                                                                                                                                                                                                                                                                                                                                                                                                                                                                                                                                                                                                                                                                                                                                                                                                                                                                                                                                                                                                                                                                                                                                    |     |                                              |             |             |  |          |  |
| Axial distribution <input type="checkbox"/> Peripheral <input type="checkbox"/> Central <input type="checkbox"/> Diffuse                                                                                                                                                                                                                                                                                                                                                                                                                                                                                                                                                                                                                                                                                                                                                                                                                                                                                                                                                                                                                                                                                                                                                                                                                                                                                                                                                                                                                                                                                                                                                                                                                                                                                                                    |     |                                              |             |             |  |          |  |
| PMF-like opacities <input type="checkbox"/> No <input type="checkbox"/> Yes                                                                                                                                                                                                                                                                                                                                                                                                                                                                                                                                                                                                                                                                                                                                                                                                                                                                                                                                                                                                                                                                                                                                                                                                                                                                                                                                                                                                                                                                                                                                                                                                                                                                                                                                                                 |     |                                              |             |             |  |          |  |
| PPFE-like opacities <input type="checkbox"/> No <input type="checkbox"/> Yes <input type="checkbox"/> Analysis not performed                                                                                                                                                                                                                                                                                                                                                                                                                                                                                                                                                                                                                                                                                                                                                                                                                                                                                                                                                                                                                                                                                                                                                                                                                                                                                                                                                                                                                                                                                                                                                                                                                                                                                                                |     |                                              |             |             |  |          |  |
| Assoc. pulm. ossification <input type="checkbox"/> No <input type="checkbox"/> Yes <input type="checkbox"/> Analysis not performed                                                                                                                                                                                                                                                                                                                                                                                                                                                                                                                                                                                                                                                                                                                                                                                                                                                                                                                                                                                                                                                                                                                                                                                                                                                                                                                                                                                                                                                                                                                                                                                                                                                                                                          |     |                                              |             |             |  |          |  |
| <b>3. Ground glass opacity</b> <input checked="" type="checkbox"/> No <input type="checkbox"/> Yes                                                                                                                                                                                                                                                                                                                                                                                                                                                                                                                                                                                                                                                                                                                                                                                                                                                                                                                                                                                                                                                                                                                                                                                                                                                                                                                                                                                                                                                                                                                                                                                                                                                                                                                                          |     |                                              |             |             |  |          |  |
| Severity <input type="checkbox"/> Mild <input type="checkbox"/> Moderate <input type="checkbox"/> Severe                                                                                                                                                                                                                                                                                                                                                                                                                                                                                                                                                                                                                                                                                                                                                                                                                                                                                                                                                                                                                                                                                                                                                                                                                                                                                                                                                                                                                                                                                                                                                                                                                                                                                                                                    |     |                                              |             |             |  |          |  |
| Craniocaudal distribution <input type="checkbox"/> Lower <input type="checkbox"/> Middle <input type="checkbox"/> Upper <input type="checkbox"/> Diffuse                                                                                                                                                                                                                                                                                                                                                                                                                                                                                                                                                                                                                                                                                                                                                                                                                                                                                                                                                                                                                                                                                                                                                                                                                                                                                                                                                                                                                                                                                                                                                                                                                                                                                    |     |                                              |             |             |  |          |  |
| Axial distribution <input type="checkbox"/> Peripheral <input type="checkbox"/> Central <input type="checkbox"/> Diffuse                                                                                                                                                                                                                                                                                                                                                                                                                                                                                                                                                                                                                                                                                                                                                                                                                                                                                                                                                                                                                                                                                                                                                                                                                                                                                                                                                                                                                                                                                                                                                                                                                                                                                                                    |     |                                              |             |             |  |          |  |
| <b>4. Consolidation</b> <input checked="" type="checkbox"/> No <input type="checkbox"/> Yes                                                                                                                                                                                                                                                                                                                                                                                                                                                                                                                                                                                                                                                                                                                                                                                                                                                                                                                                                                                                                                                                                                                                                                                                                                                                                                                                                                                                                                                                                                                                                                                                                                                                                                                                                 |     |                                              |             |             |  |          |  |
| Severity <input type="checkbox"/> Mild <input type="checkbox"/> Moderate <input type="checkbox"/> Severe                                                                                                                                                                                                                                                                                                                                                                                                                                                                                                                                                                                                                                                                                                                                                                                                                                                                                                                                                                                                                                                                                                                                                                                                                                                                                                                                                                                                                                                                                                                                                                                                                                                                                                                                    |     |                                              |             |             |  |          |  |
| Craniocaudal distribution <input type="checkbox"/> Lower <input type="checkbox"/> Middle <input type="checkbox"/> Upper <input type="checkbox"/> Diffuse                                                                                                                                                                                                                                                                                                                                                                                                                                                                                                                                                                                                                                                                                                                                                                                                                                                                                                                                                                                                                                                                                                                                                                                                                                                                                                                                                                                                                                                                                                                                                                                                                                                                                    |     |                                              |             |             |  |          |  |
| Axial distribution <input type="checkbox"/> Peripheral <input type="checkbox"/> Central <input type="checkbox"/> Diffuse                                                                                                                                                                                                                                                                                                                                                                                                                                                                                                                                                                                                                                                                                                                                                                                                                                                                                                                                                                                                                                                                                                                                                                                                                                                                                                                                                                                                                                                                                                                                                                                                                                                                                                                    |     |                                              |             |             |  |          |  |
| <b>5. Airways disease</b> <input checked="" type="checkbox"/> No <input type="checkbox"/> Yes                                                                                                                                                                                                                                                                                                                                                                                                                                                                                                                                                                                                                                                                                                                                                                                                                                                                                                                                                                                                                                                                                                                                                                                                                                                                                                                                                                                                                                                                                                                                                                                                                                                                                                                                               |     |                                              |             |             |  |          |  |
| Mosaic/Perfusion <input type="checkbox"/> None <input type="checkbox"/> Mild <input type="checkbox"/> Moderate <input type="checkbox"/> Severe                                                                                                                                                                                                                                                                                                                                                                                                                                                                                                                                                                                                                                                                                                                                                                                                                                                                                                                                                                                                                                                                                                                                                                                                                                                                                                                                                                                                                                                                                                                                                                                                                                                                                              |     |                                              |             |             |  |          |  |
| Air Trapping <input type="checkbox"/> None <input type="checkbox"/> Mild <input type="checkbox"/> Moderate <input type="checkbox"/> Severe <input type="checkbox"/> N/A                                                                                                                                                                                                                                                                                                                                                                                                                                                                                                                                                                                                                                                                                                                                                                                                                                                                                                                                                                                                                                                                                                                                                                                                                                                                                                                                                                                                                                                                                                                                                                                                                                                                     |     |                                              |             |             |  |          |  |
| Airways inflammation <input type="checkbox"/> None <input type="checkbox"/> Mild <input type="checkbox"/> Moderate <input type="checkbox"/> Severe                                                                                                                                                                                                                                                                                                                                                                                                                                                                                                                                                                                                                                                                                                                                                                                                                                                                                                                                                                                                                                                                                                                                                                                                                                                                                                                                                                                                                                                                                                                                                                                                                                                                                          |     |                                              |             |             |  |          |  |
| Non-traction bronchiectasis <input type="checkbox"/> None <input type="checkbox"/> Mild <input type="checkbox"/> Moderate <input type="checkbox"/> Severe                                                                                                                                                                                                                                                                                                                                                                                                                                                                                                                                                                                                                                                                                                                                                                                                                                                                                                                                                                                                                                                                                                                                                                                                                                                                                                                                                                                                                                                                                                                                                                                                                                                                                   |     |                                              |             |             |  |          |  |
| <b>6. Nodules</b> <input checked="" type="checkbox"/> No <input type="checkbox"/> Yes                                                                                                                                                                                                                                                                                                                                                                                                                                                                                                                                                                                                                                                                                                                                                                                                                                                                                                                                                                                                                                                                                                                                                                                                                                                                                                                                                                                                                                                                                                                                                                                                                                                                                                                                                       |     |                                              |             |             |  |          |  |
| Severity <input type="checkbox"/> Mild <input type="checkbox"/> Moderate <input type="checkbox"/> Severe                                                                                                                                                                                                                                                                                                                                                                                                                                                                                                                                                                                                                                                                                                                                                                                                                                                                                                                                                                                                                                                                                                                                                                                                                                                                                                                                                                                                                                                                                                                                                                                                                                                                                                                                    |     |                                              |             |             |  |          |  |
| Definition <input type="checkbox"/> Ground glass <input type="checkbox"/> Dense                                                                                                                                                                                                                                                                                                                                                                                                                                                                                                                                                                                                                                                                                                                                                                                                                                                                                                                                                                                                                                                                                                                                                                                                                                                                                                                                                                                                                                                                                                                                                                                                                                                                                                                                                             |     |                                              |             |             |  |          |  |
| Size <input type="checkbox"/> <5 mm <input type="checkbox"/> 5-10 mm <input type="checkbox"/> >10-30 mm <input type="checkbox"/> >30 mm                                                                                                                                                                                                                                                                                                                                                                                                                                                                                                                                                                                                                                                                                                                                                                                                                                                                                                                                                                                                                                                                                                                                                                                                                                                                                                                                                                                                                                                                                                                                                                                                                                                                                                     |     |                                              |             |             |  |          |  |
| Calcification <input type="checkbox"/> No <input type="checkbox"/> Yes                                                                                                                                                                                                                                                                                                                                                                                                                                                                                                                                                                                                                                                                                                                                                                                                                                                                                                                                                                                                                                                                                                                                                                                                                                                                                                                                                                                                                                                                                                                                                                                                                                                                                                                                                                      |     |                                              |             |             |  |          |  |
| Craniocaudal distribution <input type="checkbox"/> Lower <input type="checkbox"/> Middle <input type="checkbox"/> Upper <input type="checkbox"/> Diffuse                                                                                                                                                                                                                                                                                                                                                                                                                                                                                                                                                                                                                                                                                                                                                                                                                                                                                                                                                                                                                                                                                                                                                                                                                                                                                                                                                                                                                                                                                                                                                                                                                                                                                    |     |                                              |             |             |  |          |  |
| Distribution <input type="checkbox"/> Perilymphatic <input type="checkbox"/> Random <input type="checkbox"/> Centrilobular                                                                                                                                                                                                                                                                                                                                                                                                                                                                                                                                                                                                                                                                                                                                                                                                                                                                                                                                                                                                                                                                                                                                                                                                                                                                                                                                                                                                                                                                                                                                                                                                                                                                                                                  |     |                                              |             |             |  |          |  |
| Tree-in-bud <input type="checkbox"/> No <input type="checkbox"/> Yes                                                                                                                                                                                                                                                                                                                                                                                                                                                                                                                                                                                                                                                                                                                                                                                                                                                                                                                                                                                                                                                                                                                                                                                                                                                                                                                                                                                                                                                                                                                                                                                                                                                                                                                                                                        |     |                                              |             |             |  |          |  |
| <b>7. Emphysema</b> <input checked="" type="checkbox"/> No <input type="checkbox"/> Yes                                                                                                                                                                                                                                                                                                                                                                                                                                                                                                                                                                                                                                                                                                                                                                                                                                                                                                                                                                                                                                                                                                                                                                                                                                                                                                                                                                                                                                                                                                                                                                                                                                                                                                                                                     |     |                                              |             |             |  |          |  |
| Centrilobular <input type="checkbox"/> None <input type="checkbox"/> Mild <input type="checkbox"/> Moderate <input type="checkbox"/> Severe                                                                                                                                                                                                                                                                                                                                                                                                                                                                                                                                                                                                                                                                                                                                                                                                                                                                                                                                                                                                                                                                                                                                                                                                                                                                                                                                                                                                                                                                                                                                                                                                                                                                                                 |     |                                              |             |             |  |          |  |
| Paraseptal <input type="checkbox"/> None <input type="checkbox"/> Mild <input type="checkbox"/> Moderate <input type="checkbox"/> Severe                                                                                                                                                                                                                                                                                                                                                                                                                                                                                                                                                                                                                                                                                                                                                                                                                                                                                                                                                                                                                                                                                                                                                                                                                                                                                                                                                                                                                                                                                                                                                                                                                                                                                                    |     |                                              |             |             |  |          |  |
| Panlobular <input type="checkbox"/> None <input type="checkbox"/> Mild <input type="checkbox"/> Moderate <input type="checkbox"/> Severe                                                                                                                                                                                                                                                                                                                                                                                                                                                                                                                                                                                                                                                                                                                                                                                                                                                                                                                                                                                                                                                                                                                                                                                                                                                                                                                                                                                                                                                                                                                                                                                                                                                                                                    |     |                                              |             |             |  |          |  |
| <b>8. Misc. Lung Findings</b> <input checked="" type="checkbox"/> No <input type="checkbox"/> Yes                                                                                                                                                                                                                                                                                                                                                                                                                                                                                                                                                                                                                                                                                                                                                                                                                                                                                                                                                                                                                                                                                                                                                                                                                                                                                                                                                                                                                                                                                                                                                                                                                                                                                                                                           |     |                                              |             |             |  |          |  |
| Cysts <input type="checkbox"/> None <input type="checkbox"/> Mild <input type="checkbox"/> Moderate <input type="checkbox"/> Severe                                                                                                                                                                                                                                                                                                                                                                                                                                                                                                                                                                                                                                                                                                                                                                                                                                                                                                                                                                                                                                                                                                                                                                                                                                                                                                                                                                                                                                                                                                                                                                                                                                                                                                         |     |                                              |             |             |  |          |  |
| Interlobular septal thick. <input type="checkbox"/> None <input type="checkbox"/> Mild <input type="checkbox"/> Moderate <input type="checkbox"/> Severe                                                                                                                                                                                                                                                                                                                                                                                                                                                                                                                                                                                                                                                                                                                                                                                                                                                                                                                                                                                                                                                                                                                                                                                                                                                                                                                                                                                                                                                                                                                                                                                                                                                                                    |     |                                              |             |             |  |          |  |
| Crazy Paving <input type="checkbox"/> None <input type="checkbox"/> Mild <input type="checkbox"/> Moderate <input type="checkbox"/> Severe                                                                                                                                                                                                                                                                                                                                                                                                                                                                                                                                                                                                                                                                                                                                                                                                                                                                                                                                                                                                                                                                                                                                                                                                                                                                                                                                                                                                                                                                                                                                                                                                                                                                                                  |     |                                              |             |             |  |          |  |
| Subpleural Sparing <input type="checkbox"/> No <input type="checkbox"/> Yes                                                                                                                                                                                                                                                                                                                                                                                                                                                                                                                                                                                                                                                                                                                                                                                                                                                                                                                                                                                                                                                                                                                                                                                                                                                                                                                                                                                                                                                                                                                                                                                                                                                                                                                                                                 |     |                                              |             |             |  |          |  |
| Reversed Halo <input type="checkbox"/> No <input type="checkbox"/> Yes                                                                                                                                                                                                                                                                                                                                                                                                                                                                                                                                                                                                                                                                                                                                                                                                                                                                                                                                                                                                                                                                                                                                                                                                                                                                                                                                                                                                                                                                                                                                                                                                                                                                                                                                                                      |     |                                              |             |             |  |          |  |
| Perilobular Opacities <input type="checkbox"/> No <input type="checkbox"/> Yes                                                                                                                                                                                                                                                                                                                                                                                                                                                                                                                                                                                                                                                                                                                                                                                                                                                                                                                                                                                                                                                                                                                                                                                                                                                                                                                                                                                                                                                                                                                                                                                                                                                                                                                                                              |     |                                              |             |             |  |          |  |
| <b>9. Non-lung findings</b> <input checked="" type="checkbox"/> No <input type="checkbox"/> Yes <input type="checkbox"/> Analysis not performed                                                                                                                                                                                                                                                                                                                                                                                                                                                                                                                                                                                                                                                                                                                                                                                                                                                                                                                                                                                                                                                                                                                                                                                                                                                                                                                                                                                                                                                                                                                                                                                                                                                                                             |     |                                              |             |             |  |          |  |
| Extensive LAD <input type="checkbox"/> No <input type="checkbox"/> Yes <input type="checkbox"/> Analysis not performed                                                                                                                                                                                                                                                                                                                                                                                                                                                                                                                                                                                                                                                                                                                                                                                                                                                                                                                                                                                                                                                                                                                                                                                                                                                                                                                                                                                                                                                                                                                                                                                                                                                                                                                      |     |                                              |             |             |  |          |  |
| Pleural disease <input type="checkbox"/> No <input type="checkbox"/> Yes <input type="checkbox"/> Analysis not performed                                                                                                                                                                                                                                                                                                                                                                                                                                                                                                                                                                                                                                                                                                                                                                                                                                                                                                                                                                                                                                                                                                                                                                                                                                                                                                                                                                                                                                                                                                                                                                                                                                                                                                                    |     |                                              |             |             |  |          |  |
| Esophageal dilation <input type="checkbox"/> No <input type="checkbox"/> Yes <input type="checkbox"/> Analysis not performed                                                                                                                                                                                                                                                                                                                                                                                                                                                                                                                                                                                                                                                                                                                                                                                                                                                                                                                                                                                                                                                                                                                                                                                                                                                                                                                                                                                                                                                                                                                                                                                                                                                                                                                |     |                                              |             |             |  |          |  |
| <b>10. Summary</b>                                                                                                                                                                                                                                                                                                                                                                                                                                                                                                                                                                                                                                                                                                                                                                                                                                                                                                                                                                                                                                                                                                                                                                                                                                                                                                                                                                                                                                                                                                                                                                                                                                                                                                                                                                                                                          |     |                                              |             |             |  |          |  |
| UIP designation (new) <input type="checkbox"/> UIP <input type="checkbox"/> Indeterminate for UIP                                                                                                                                                                                                                                                                                                                                                                                                                                                                                                                                                                                                                                                                                                                                                                                                                                                                                                                                                                                                                                                                                                                                                                                                                                                                                                                                                                                                                                                                                                                                                                                                                                                                                                                                           |     |                                              |             |             |  |          |  |
| <input type="checkbox"/> Probable UIP <input type="checkbox"/> Alternative diagnosis                                                                                                                                                                                                                                                                                                                                                                                                                                                                                                                                                                                                                                                                                                                                                                                                                                                                                                                                                                                                                                                                                                                                                                                                                                                                                                                                                                                                                                                                                                                                                                                                                                                                                                                                                        |     |                                              |             |             |  |          |  |
| UIP designation (old) <input type="checkbox"/> Definite <input type="checkbox"/> Possible <input type="checkbox"/> Inconsistent                                                                                                                                                                                                                                                                                                                                                                                                                                                                                                                                                                                                                                                                                                                                                                                                                                                                                                                                                                                                                                                                                                                                                                                                                                                                                                                                                                                                                                                                                                                                                                                                                                                                                                             |     |                                              |             |             |  |          |  |
| Leading Diagnosis                                                                                                                                                                                                                                                                                                                                                                                                                                                                                                                                                                                                                                                                                                                                                                                                                                                                                                                                                                                                                                                                                                                                                                                                                                                                                                                                                                                                                                                                                                                                                                                                                                                                                                                                                                                                                           |     |                                              |             |             |  |          |  |
| Alt. diagnosis 1                                                                                                                                                                                                                                                                                                                                                                                                                                                                                                                                                                                                                                                                                                                                                                                                                                                                                                                                                                                                                                                                                                                                                                                                                                                                                                                                                                                                                                                                                                                                                                                                                                                                                                                                                                                                                            |     |                                              |             |             |  |          |  |
| Alt. diagnosis 2                                                                                                                                                                                                                                                                                                                                                                                                                                                                                                                                                                                                                                                                                                                                                                                                                                                                                                                                                                                                                                                                                                                                                                                                                                                                                                                                                                                                                                                                                                                                                                                                                                                                                                                                                                                                                            |     |                                              |             |             |  |          |  |
| Confidence in diagnosis <input type="checkbox"/> High <input type="checkbox"/> Intermediate <input type="checkbox"/> Low                                                                                                                                                                                                                                                                                                                                                                                                                                                                                                                                                                                                                                                                                                                                                                                                                                                                                                                                                                                                                                                                                                                                                                                                                                                                                                                                                                                                                                                                                                                                                                                                                                                                                                                    |     |                                              |             |             |  |          |  |
| Notes                                                                                                                                                                                                                                                                                                                                                                                                                                                                                                                                                                                                                                                                                                                                                                                                                                                                                                                                                                                                                                                                                                                                                                                                                                                                                                                                                                                                                                                                                                                                                                                                                                                                                                                                                                                                                                       |     |                                              |             |             |  |          |  |
| Empty Fields <span style="float: right;">13</span>                                                                                                                                                                                                                                                                                                                                                                                                                                                                                                                                                                                                                                                                                                                                                                                                                                                                                                                                                                                                                                                                                                                                                                                                                                                                                                                                                                                                                                                                                                                                                                                                                                                                                                                                                                                          |     |                                              |             |             |  |          |  |
| UIP discrepancy? <span style="float: right;">0</span>                                                                                                                                                                                                                                                                                                                                                                                                                                                                                                                                                                                                                                                                                                                                                                                                                                                                                                                                                                                                                                                                                                                                                                                                                                                                                                                                                                                                                                                                                                                                                                                                                                                                                                                                                                                       |     |                                              |             |             |  |          |  |
| >1 check selected <span style="float: right;">0</span>                                                                                                                                                                                                                                                                                                                                                                                                                                                                                                                                                                                                                                                                                                                                                                                                                                                                                                                                                                                                                                                                                                                                                                                                                                                                                                                                                                                                                                                                                                                                                                                                                                                                                                                                                                                      |     |                                              |             |             |  |          |  |
| Actual Diagnosis                                                                                                                                                                                                                                                                                                                                                                                                                                                                                                                                                                                                                                                                                                                                                                                                                                                                                                                                                                                                                                                                                                                                                                                                                                                                                                                                                                                                                                                                                                                                                                                                                                                                                                                                                                                                                            |     |                                              |             |             |  |          |  |
| <b>DEFINITIONS</b>                                                                                                                                                                                                                                                                                                                                                                                                                                                                                                                                                                                                                                                                                                                                                                                                                                                                                                                                                                                                                                                                                                                                                                                                                                                                                                                                                                                                                                                                                                                                                                                                                                                                                                                                                                                                                          |     |                                              |             |             |  |          |  |
| <p><b>Ground glass opacity:</b> Confluent areas of opacity that do not obscure the underlying vessels. This is in the absence of significant associated irregular reticulation.</p> <p><b>Consolidation:</b> Confluent areas of opacity that do obscure the underlying vessels.</p> <p><b>Irregular reticulation:</b> Linear opacities that do not represent smooth or nodular interlobular septal thickening.</p> <p><b>Traction bronchiectasis:</b> Dilated and irregular bronchi due to adjacent fibrosis with a lack of inflammatory thickening or mucous impaction.</p> <p><b>Honeycombing:</b> Air density cysts with relatively thick walls that are first seen in the subpleural lung and then become stacked into multiple layers. At least 3 air density cysts lined up in the subpleural lung in a single row must be present. Also, at least one supportive sign of fibrosis must be present.</p> <p><b>Mosaic perfusion:</b> Geographic areas of decreased lung attenuation with sharp margins seen on inspiratory CT.</p> <p><b>Air trapping:</b> On expiratory images, the presence of areas of lung that do not significantly increase in attenuation when compared to the inspiratory images.</p> <p><b>Nodules:</b> Multiple rounded opacities.</p> <p><b>Emphysema:</b> Centrilobular emphysema are focal, air density lucencies without a wall typically predominating in the central portions of the upper lobes. Paraseptal emphysema are focal, air density lucencies with a thin wall located in the subpleural lung in a single layer. Panlobular emphysema is diffuse lung lucency with a lower lung predominance.</p> <p><b>Cysts:</b> Focal air attenuation lucencies with a thin, but perceptible wall that typically predominate in the central lung, however occasionally may be subpleural in location.</p> |     |                                              |             |             |  |          |  |
| <b>OTHER DEFINITIONS</b>                                                                                                                                                                                                                                                                                                                                                                                                                                                                                                                                                                                                                                                                                                                                                                                                                                                                                                                                                                                                                                                                                                                                                                                                                                                                                                                                                                                                                                                                                                                                                                                                                                                                                                                                                                                                                    |     |                                              |             |             |  |          |  |
| <p><b>Severity:</b></p> <p>Mild: &lt;10% lung involvement</p> <p>Moderate: 10-50% lung involvement</p> <p>Severe: &gt;50% lung involvement</p> <p>For mosaic perfusion and air trapping to be moderate or severe they must also be present bilaterally and in at least 3 lobes</p> <p><b>Bronchiectasis (traction or non-traction) severity:</b></p> <p>Calculate severity in each lobe as (0=none, 1=mild, 2=moderate, 3=severe)</p> <p>The sum of all lobes determines overall severity:</p> <p>Mild ≤3</p> <p>Moderate 4-7</p> <p>Severe ≥8</p> <p><b>Confidence in diagnosis:</b></p> <p>High: ≥90% likelihood</p> <p>Intermediate: 51-89% likelihood</p> <p>Low: ≤50% likelihood</p>                                                                                                                                                                                                                                                                                                                                                                                                                                                                                                                                                                                                                                                                                                                                                                                                                                                                                                                                                                                                                                                                                                                                                   |     |                                              |             |             |  |          |  |

Figure E2. Histopathology data collection form

### ILD HISTOPATHOLOGIC SCORING FORM

Name: \_\_\_\_\_  
                                 Last                                                First

Biopsy date: \_\_\_\_\_ Biopsy site(s):  RUL     LUL     TBBx  
 RML     Lingula     Unknown  
Pathologist:  Jones     Other: \_\_\_\_\_  RLL     LLL     Other \_\_\_\_\_

| <b>GENERAL OBSERVATIONS</b> |
|-----------------------------|
|-----------------------------|

Low Magnification

|                                                    |     |    |     |
|----------------------------------------------------|-----|----|-----|
| 1. Heterogeneous distribution of abnormal areas    | Yes | No | N/A |
| 2. Accentuation of fibrosis at the pleural surface | Yes | No | N/A |
| 3. Abnormalities airway centered                   | Yes | No | N/A |
| 4. Diffuse alveolar septal thickening is present   | Yes | No | N/A |

High Magnification

|                                               |     |    |     |
|-----------------------------------------------|-----|----|-----|
| 1. Temporal heterogeneity                     | Yes | No | N/A |
| 2. Inflammation confined to areas of fibrosis | Yes | No | N/A |
| 3. Microscopic honeycombing                   | Yes | No | N/A |
| 4. Areas of normal lung                       | Yes | No | N/A |

| <b>SPECIFIC FINDINGS (0 = ABSENT, 1 = MILD, 2 = MODERATE, 3 = MARKED)</b> |
|---------------------------------------------------------------------------|
|---------------------------------------------------------------------------|

|                                                                      |   |   |   |   |
|----------------------------------------------------------------------|---|---|---|---|
| 1. Fibroblast foci (interstitial young connective tissue)            | 0 | 1 | 2 | 3 |
| 2. Organizing pneumonia (airway luminal granulation tissue)          | 0 | 1 | 2 | 3 |
| 3. Lymphocytic interstitial infiltrate in areas on non-fibrotic lung | 0 | 1 | 2 | 3 |
| 4. Alveolar macrophages                                              | 0 | 1 | 2 | 3 |
| 5. Dense collagen fibrosis                                           | 0 | 1 | 2 | 3 |
| 6. Granuloma/Giant cells                                             | 0 | 1 | 2 | 3 |
| 7. Germinal centers                                                  | 0 | 1 | 2 | 3 |
| 8. Inorganic dust deposits                                           | 0 | 1 | 2 | 3 |
| 9. Hemosiderin laden macrophages and intra-alveolar blood            | 0 | 1 | 2 | 3 |
| 10. Eosinophilia/Eosinophilic abscess                                | 0 | 1 | 2 | 3 |
| 11. Airway-centered inflammation                                     | 0 | 1 | 2 | 3 |
| 12. Small airways disease                                            | 0 | 1 | 2 | 3 |
| 13. Emphysema                                                        | 0 | 1 | 2 | 3 |
| 14. Acute lung injury (hyaline membranes)                            | 0 | 1 | 2 | 3 |

**Figure E3.** Principal component analysis, discovery cohort. Black lines define the European subgroup.

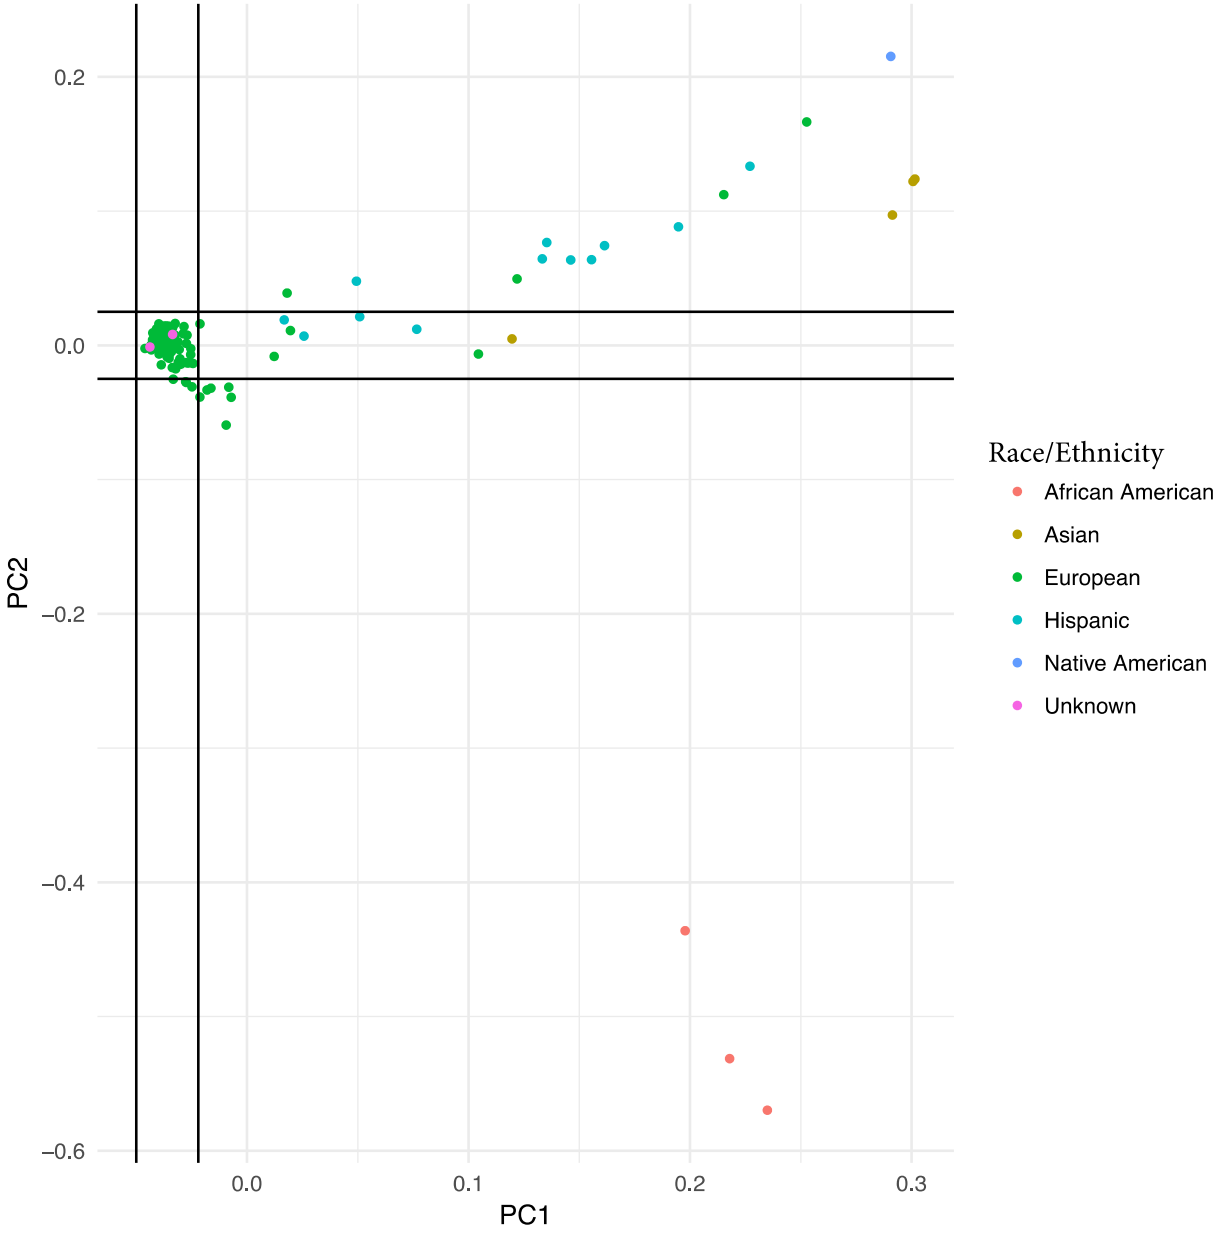

**Figure E4.** Principal component analysis, discovery cohort, restricted to the European subgroup, after excluding outliers.

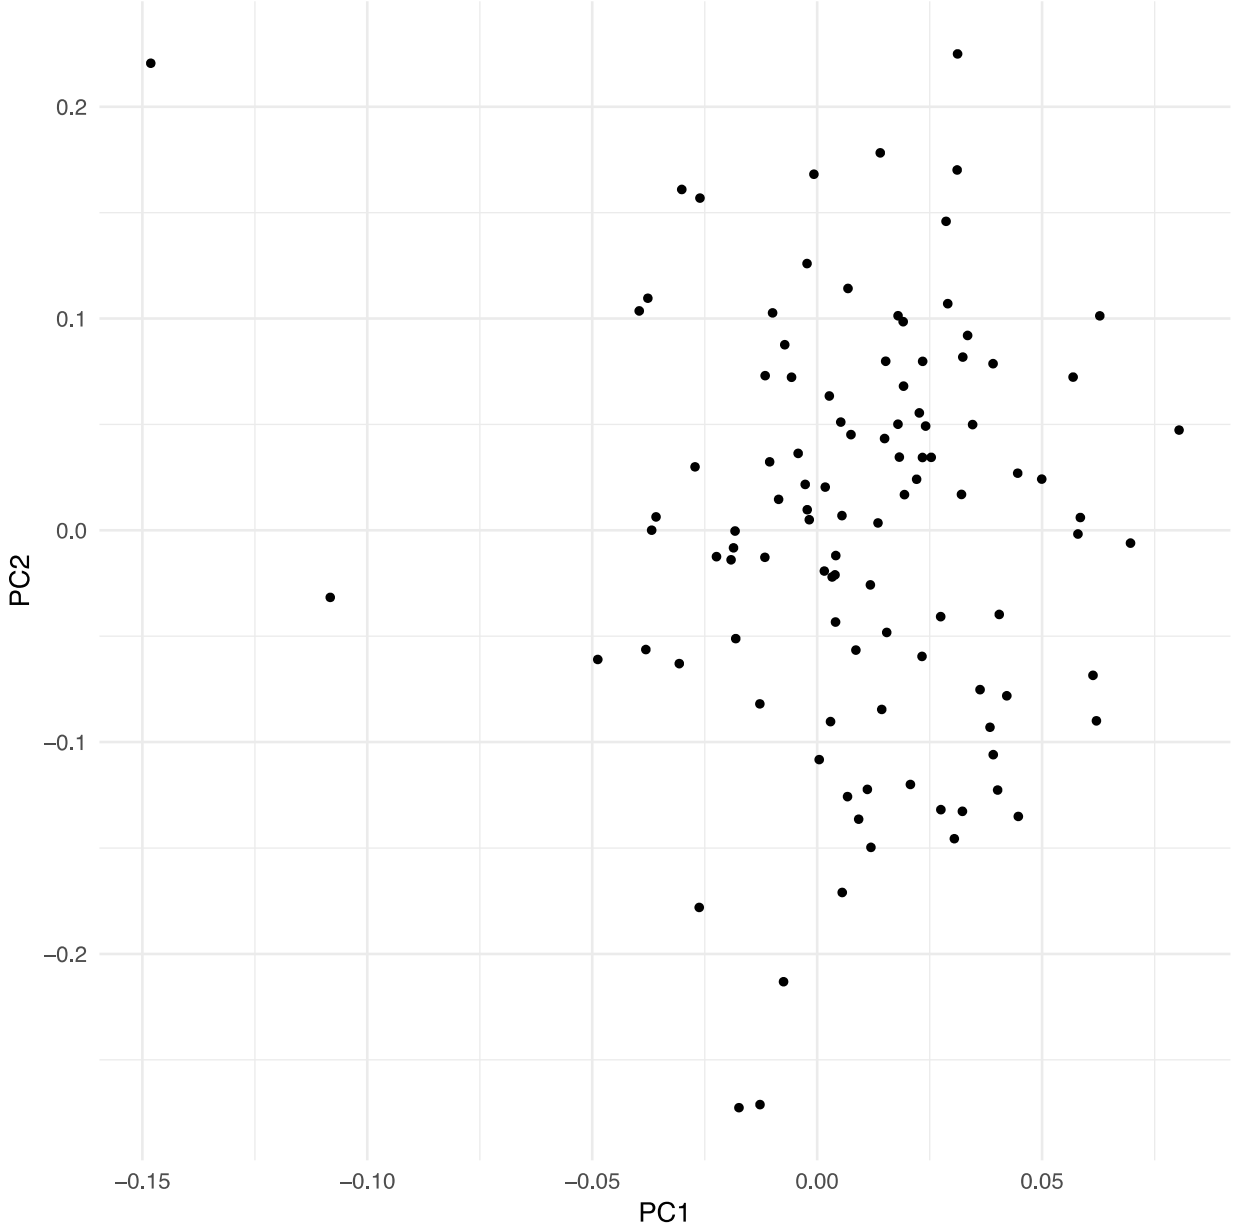

**Figure E5.** Principal component analysis, replication cohort. Black lines define the European subgroup.

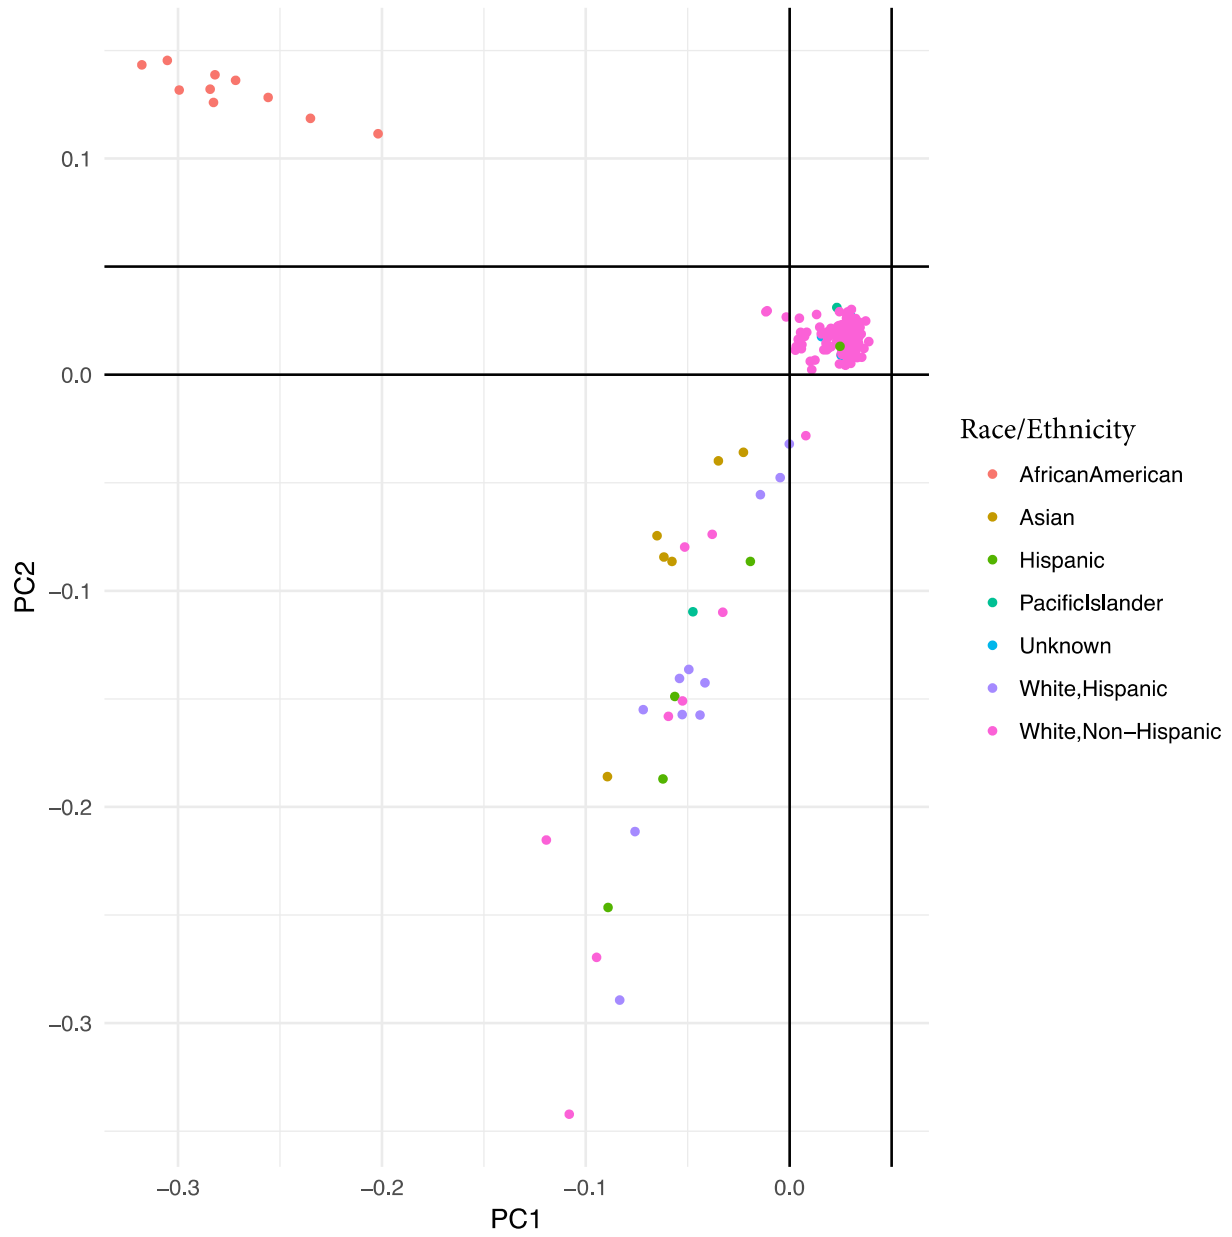



**Figure E6.** Principal component analysis, discovery cohort, restricted to the European subgroup, after excluding outliers.

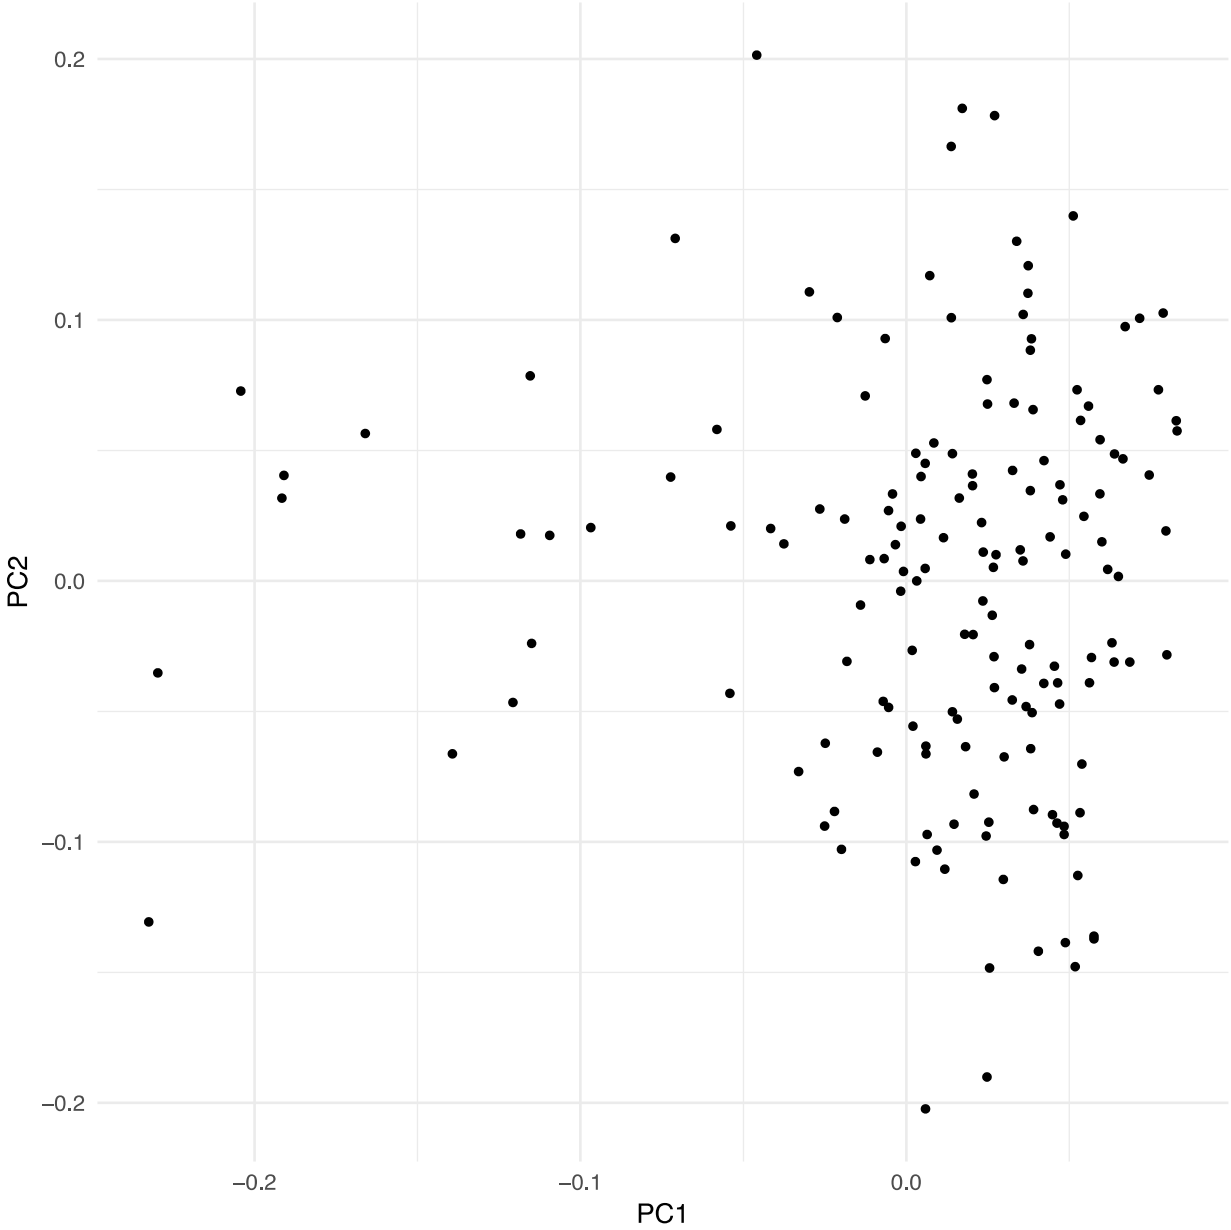

















**Table E8.** Comparison of pathologic features by telomere variant status

| Feature                         | Total      | All        |          | p-value | European   |          | p-value* |
|---------------------------------|------------|------------|----------|---------|------------|----------|----------|
|                                 |            | No Variant | Variant  |         | No Variant | Variant  |          |
| N                               | 110        | 98         | 12       |         | 78         | 8        |          |
| Microscopic honeycombing        | 24 (22.0%) | 20 (21%)   | 4 (33%)  | 0.30    | 16 (21%)   | 3 (38%)  | 0.37     |
| Heterogenous distribution       | 75 (68.2%) | 65 (66%)   | 10 (83%) | 0.33    | 52 (67%)   | 8 (100%) | 0.099    |
| Subpleural accentuation         | 28 (25.9%) | 23 (24%)   | 5 (42%)  | 0.29    | 19 (25%)   | 4 (50%)  | 0.21     |
| Airway centered                 | 80 (73.4%) | 70 (72%)   | 10 (83%) | 0.51    | 55 (71%)   | 7 (88%)  | 0.44     |
| <u>Dense collagen fibrosis</u>  |            |            |          | 0.66    |            |          | 0.92     |
| None                            | 26 (23.6%) | 24 (24%)   | 2 (17%)  |         | 19 (24%)   | 1 (12%)  |          |
| Mild                            | 36 (32.7%) | 33 (34%)   | 3 (25%)  |         | 28 (36%)   | 3 (38%)  |          |
| Moderate                        | 20 (18.2%) | 18 (18%)   | 2 (17%)  |         | 12 (15%)   | 1 (12%)  |          |
| Marked                          | 28 (25.5%) | 23 (23%)   | 5 (42%)  |         | 19 (24%)   | 3 (38%)  |          |
| Any                             | 84 (76.4%) | 74 (76%)   | 10 (83%) | 0.73    | 59 (76%)   | 7 (88%)  | 0.67     |
| Moderate-Marked                 | 48 (43.6%) | 41 (42%)   | 7 (58%)  | 0.36    | 31 (40%)   | 4 (50%)  | 0.71     |
| <u>Interstitial granulomas</u>  |            |            |          | 0.97    |            |          | 0.84     |
| None                            | 32 (29.1%) | 29 (30%)   | 3 (25%)  |         | 21 (27%)   | 1 (12%)  |          |
| Mild                            | 19 (17.3%) | 17 (17%)   | 2 (17%)  |         | 12 (15%)   | 1 (12%)  |          |
| Moderate                        | 29 (26.4%) | 26 (27%)   | 3 (25%)  |         | 23 (29%)   | 3 (38%)  |          |
| Marked                          | 30 (27.3%) | 26 (27%)   | 4 (33%)  |         | 22 (28%)   | 3 (38%)  |          |
| Any                             | 78 (70.9%) | 69 (70%)   | 9 (75%)  | 1.00    | 57 (73%)   | 7 (88%)  | 0.67     |
| Moderate-Marked                 | 59 (53.6%) | 52 (53%)   | 7 (58%)  | 0.77    | 45 (58%)   | 6 (75%)  | 0.46     |
| <u>Lymphocytic infiltration</u> |            |            |          | 0.96    |            |          | 1.00     |
| None                            | 16 (14.8%) | 15 (16%)   | 1 (8%)   |         | 9 (12%)    | 1 (12%)  |          |
| Mild                            | 34 (31.5%) | 30 (31%)   | 4 (33%)  |         | 24 (32%)   | 3 (38%)  |          |
| Moderate                        | 52 (48.1%) | 45 (47%)   | 7 (58%)  |         | 37 (49%)   | 4 (50%)  |          |
| Marked                          | 6 (5.6%)   | 6 (6%)     | 0 (0%)   |         | 6 (8%)     | 0 (0%)   |          |
| Any                             | 92 (85.2%) | 81 (84%)   | 11 (92%) | 0.69    | 67 (88%)   | 7 (88%)  | 1.00     |
| Moderate-Marked                 | 58 (53.7%) | 51 (53%)   | 7 (58%)  | 0.77    | 43 (57%)   | 4 (50%)  | 0.73     |
| <u>Fibroblastic foci</u>        |            |            |          | 0.004   |            |          | 0.019    |
| None                            | 69 (63.3%) | 65 (67%)   | 4 (33%)  |         | 54 (70%)   | 3 (38%)  |          |
| Mild                            | 31 (28.4%) | 27 (28%)   | 4 (33%)  |         | 21 (27%)   | 3 (38%)  |          |
| Moderate                        | 8 (7.3%)   | 5 (5%)     | 3 (25%)  |         | 2 (3%)     | 1 (12%)  |          |
| Marked                          | 1 (0.9%)   | 0 (0%)     | 1 (8%)   |         | 0 (0%)     | 1 (12%)  |          |
| Any                             | 40 (36.7%) | 32 (33%)   | 8 (67%)  | 0.029   | 23 (30%)   | 5 (62%)  | 0.11     |
| Moderate-Marked                 | 9 (8.3%)   | 5 (5%)     | 4 (33%)  | 0.008   | 2 (3%)     | 2 (25%)  | 0.043    |
| <u>Small airway disease</u>     |            |            |          | 0.75    |            |          | 0.22     |
| None                            | 15 (14.0%) | 14 (15%)   | 1 (9%)   |         | 11 (14%)   | 1 (12%)  |          |
| Mild                            | 50 (46.7%) | 43 (45%)   | 7 (64%)  |         | 37 (49%)   | 6 (75%)  |          |
| Moderate                        | 32 (29.9%) | 30 (31%)   | 2 (18%)  |         | 22 (29%)   | 0 (0%)   |          |
| Marked                          | 10 (9.3%)  | 9 (9%)     | 1 (9%)   |         | 6 (8%)     | 1 (12%)  |          |
| Any                             | 92 (86.0%) | 82 (85%)   | 10 (91%) | 1.00    | 65 (86%)   | 7 (88%)  | 1.00     |
| Moderate-Marked                 | 42 (39.3%) | 39 (41%)   | 3 (27%)  | 0.52    | 28 (37%)   | 1 (12%)  | 0.25     |

\*Trends in associations between variant status and semi-quantitative categories were evaluated using a multinomial logistic regression model.

**Table E9.** Coverage statistics for candidate genes

| GENE  | Discovery Cohort |         | Replication Cohort |         |
|-------|------------------|---------|--------------------|---------|
|       | Median           | Minimum | Median             | Minimum |
| DKC1  | 28               | 8       | 35                 | 29      |
| PARN  | 28               | 20      | 29                 | 25      |
| RTEL1 | 37               | 23      | 35                 | 30      |
| TERC  | 32               | 22      | 51                 | 15      |
| TERT  | 36               | 23      | 40                 | 30      |
| TINF2 | 29               | 20      | 44                 | 31      |

Footnote:

1. Median = median of median coverage per exon across samples in read depth
2. Minimum = median of minimum coverage per exon across samples in read depth

**Table E10.** Comparison of variant inclusion criteria and variant frequencies between the current study and prior studies of telomere-related gene variants in idiopathic pulmonary fibrosis and rheumatoid arthritis-associated interstitial lung disease

| Study                          | Genes included                          | MAF cut-off                                                       | Predicted effects                                                           | Frequency in Cases from Reference Study                             | Frequency in Controls from Reference Study                          | Frequency in non-Hispanic White Cases from Discovery Cohort in Current Study | Frequency in non-Hispanic White Cases from Replication Cohort in Current Study |
|--------------------------------|-----------------------------------------|-------------------------------------------------------------------|-----------------------------------------------------------------------------|---------------------------------------------------------------------|---------------------------------------------------------------------|------------------------------------------------------------------------------|--------------------------------------------------------------------------------|
| Ley et al (current study)      | TERT, TERC, PARN, RTEL1, TINF2, DKC1    | 0.005                                                             | 1. LoF<br>2. PP2 – at least possibly damaging<br>3. SIFT- deleterious       | n/a                                                                 | n/a                                                                 | n/a                                                                          | n/a                                                                            |
| Petrovski et al (Reference 29) | Whole Exome                             | 0.0005 cases/controls AND absent in Exome Variant Server and ExAC | 1. LoF<br>2. PP2- at least probably damaging                                | TERT = 0.0496<br>RTEL1 = 0.0229<br>PARN = 0.0267<br>Combined = 9.9% | TERT = 0.0014<br>RTEL1 = 0.0<br>PARN = 0.0012<br>Combined = 0.26%   | TERT = 0.0248<br>RTEL1 = 0.0083<br>PARN = 0.0<br>Combined = 3.3%             | TERT = 0.0237<br>RTEL1 = 0.0059<br>PARN = 0.0059<br>Combined = 3.6%            |
| Juge et al (Reference 31)      | ABCA3, PARN, RTEL1, SFTPA2, SFTPC, TERT | 0.01                                                              | 1. PP2 probably damaging or SIFT deleterious<br>2. GERP >=2<br>3. CADD >=10 | TERT = 0.0741<br>RTEL1 = 0.0370<br>PARN = 0.123<br>Combined = 12.3% | TERT = 0.0168<br>RTEL1 = 0.0139<br>PARN = 0.0069<br>Combined = 3.8% | TERT = 0.0413<br>RTEL1 = 0.0413<br>PARN = 0.0083<br>Combined = 8.3%          | TERT = 0.0355<br>RTEL1 = 0.0296<br>PARN = 0.0118<br>Combined = 7.7%            |
| Dressen et al (Reference 30)   | Whole Genome                            | 0.01                                                              | PP2 >=0.5 OR high-impact                                                    | TERT = 0.0424<br>RTEL1 = 0.0305<br>PARN = 0.0124<br>Combined = 8.5% | TERT = 0.01<br>RTEL1 = 0.0176<br>PARN = 0.001<br>Combined = 2.9%    | TERT = 0.0496<br>RTEL1 = 0.0331<br>PARN = 0.0165<br>Combined = 9.9%          | TERT = 0.0355<br>RTEL1 = 0.0355<br>PARN = 0.0118<br>Combined = 8.3%            |

Abbreviations: MAF = minor allele frequency, ExAC = Exome Aggregation Consortium, LoF = loss of function, PP2 = polyphen-2, SIFT = Sorting Intolerant from Tolerant, GERP = Genomic Evolutionary Rate Profiling score, CADD = Combined Annotation Dependent Depletion score
